# Supplementary material for: DNA polymerase θ accomplishes translesion synthesis opposite 1,N6-ethenodeoxyadenosine with a remarkably high fidelity in human cells
Source: PubMed Central journal article supplement — Genes Dev. 2019 Mar 1;33(5-6):282–7. doi: 10.1101/gad.320531.118 (PMC6411006; doi:10.1101/gad.320531.118), 2019-03-01

## **Supplemental Material**

**DNA polymerase  $\theta$  accomplishes translesion synthesis opposite 1,N<sup>6</sup>-ethenodeoxyadenosine with a remarkably high fidelity in human cells**

**Jung-Hoon Yoon, Robert E. Johnson, Louise Prakash\*, and Satya Prakash**

Department of Biochemistry and Molecular Biology, University of Texas Medical Branch  
at Galveston, 301 University Boulevard, Galveston, TX 77555, USA

**\*Corresponding author:** Louise Prakash, [loprakas@utmb.edu](mailto:loprakas@utmb.edu)

This PDF file includes: Supplemental Methods, Supplemental Tables 1-6, and Supplemental Figures 1-4.

## Supplemental Methods

### *Western blot analysis of siRNA depletion of TLS Pols in HF<sub>s</sub> and MEF<sub>s</sub>*

48h after siRNA transfection, cells were washed with PBS buffer and lysed with RIPA buffer (1x PBS, 1% IP-40, 0.5% sodium deoxycholate, 0.1% SDS). 30µg of prepared cellular extracts were separated on a 10% SDS-polyacrylamide gel and transferred to a PVDF membrane (Bio-rad). The membranes were probed with antibodies against Polη (rabbit polyclonal antibody against full length of human Polη), Polι (rabbit polyclonal antibody against full length of human Polι), Polκ (Santa Cruz Biotechnology), Rev1 (Santa Cruz Biotechnology), Rev7 (Abcam), or Polθ (Abcam) followed by appropriate secondary antibodies conjugated with horseradish peroxidase. The signals were detected using ECL-Plus (GenDEPOT). For the loading control, anti-β-tubulin antibody (Santa Cruz Biotechnology) was used.

### *Stable expression of wild type and catalytic mutant of human (1708-2590) Polθ in HF<sub>s</sub> or MEF<sub>s</sub>*

As described previously (Yoon et al. 2014), wild type Polθ (1708-2590) and its catalytic mutant containing D2540A, E2541A mutations in the active site residues were subcloned into pCMV7-3xFlag-zeo vector (Sigma). The vectors were transfected into HF<sub>s</sub> (GM637) or MEF<sub>s</sub> by Lipofectamine 2000 reagent (Invitrogen). After 24h incubation, 0.5 µg of Zeocin (GenDEPOT) were added to the culture media. After 3 days of incubation, cells were washed with PBS buffer and were continuously cultured with the media containing 250 ng of Zeocin for ~ 2 weeks. The protein expression and siRNA knock down efficiency were checked by western blot analysis.

### *Stable expression of wild type and catalytic mutant of human Rev1 in HF<sub>s</sub> or MEF<sub>s</sub>*

As described previously (Yoon et al. 2018), siRNA sensitive and siRNA resistant WT and catalytic mutant D570A, E571A Rev1 were expressed in GM637 HF<sub>s</sub> or MEF<sub>s</sub> using pCMV7-3x Flag-zeo vector.

- Yoon JH, Hodge, RP, Hackfeld, LC, Park, J, Roy Choudhury, J, Prakash, S, and Prakash, L. 2018. Genetic control of predominantly error-free replication through an acrolein-derived minor-groove DNA adduct. *J Biol Chem* **293**: 2949-2958.
- Yoon JH, Roy Choudhury, J, Park, J, Prakash, S, and Prakash, L. 2014. A role for DNA polymerase theta in promoting replication through oxidative DNA lesion, thymine glycol, in human cells. *J Biol Chem* **289**: 13177-13185.

**Supplemental Table S1**

Effects of siRNA knockdown of TLS polymerases on the replicative bypass of the  $\epsilon$ dA lesion carried on the leading strand template in wild type, Rev1<sup>-/-</sup>, or Polθ<sup>-/-</sup> MEFs

| MEFs                | siRNA | Number of <i>Kan</i> <sup>+</sup> colonies | Number of blue colonies among <i>Kan</i> <sup>+</sup> | TLS (%) |
|---------------------|-------|--------------------------------------------|-------------------------------------------------------|---------|
| WT                  | NC    | 422                                        | 94                                                    | 22.3    |
|                     | NC    | 350                                        | 28                                                    | 8.0     |
| Rev1 <sup>-/-</sup> | Polι  | 308                                        | 26                                                    | 8.4     |
|                     | Rev3  | 296                                        | 24                                                    | 8.1     |
|                     | Polθ  | 411                                        | 4                                                     | 1.0     |
|                     | NC    | 387                                        | 44                                                    | 11.4    |
| Polθ <sup>-/-</sup> | Polι  | 432                                        | 15                                                    | 3.5     |
|                     | Rev3  | 408                                        | 14                                                    | 3.4     |
|                     | Rev1  | 367                                        | 4                                                     | 1.1     |
|                     | NC    | 387                                        | 44                                                    | 11.4    |

**Supplemental Table S2**

Effects of catalytically active (WT) Rev1 or catalytically inactive D570A E571A mutant Rev1 on TLS opposite  $\epsilon$ dA carried on the leading strand template in human fibroblasts

| siRNA | Vector expressing         | No. Kan <sup>+</sup> colonies | No. blue colonies among Kan <sup>+</sup> | TLS (%) | TLS pathway that remains active                      |
|-------|---------------------------|-------------------------------|------------------------------------------|---------|------------------------------------------------------|
| NC    | -                         | 404                           | 102                                      | 25.2    | Pol $\iota$ /Pol $\zeta$ , Rev1<br>Pol, Pol $\theta$ |
| Rev1  | -                         | 415                           | 38                                       | 9.2     | Pol $\theta$                                         |
| Rev1  | WT Rev1                   | 317                           | 30                                       | 9.5     | Pol $\theta$                                         |
| Rev1  | siR <sup>a</sup> -WT Rev1 | 364                           | 85                                       | 23.4    | Pol $\iota$ /Pol $\zeta$ , Rev1<br>Pol, Pol $\theta$ |
| Rev1  | siR catalytic mutant Rev1 | 294                           | 58                                       | 19.7    | Pol $\iota$ /Pol $\zeta$ , Pol $\theta$              |

<sup>a</sup>siR, indicates siRNA resistant form of WT or mutant Rev1

**Supplemental Table S3**

Effects of catalytically active (WT) Rev1 or catalytically inactive D570A E571A mutant Rev1 on TLS opposite  $\epsilon$ dA carried on the leading strand template in Rev1<sup>-/-</sup> MEFs

| Vector expressing     | Number of <i>Kan</i> <sup>+</sup> colonies | Number of blue colonies among <i>Kan</i> <sup>+</sup> | TLS (%) | TLS pathway that remains active                      |
|-----------------------|--------------------------------------------|-------------------------------------------------------|---------|------------------------------------------------------|
| —                     | 458                                        | 38                                                    | 8.3     | Pol $\theta$                                         |
| WT Rev1               | 364                                        | 70                                                    | 19.2    | Pol $\iota$ /Pol $\zeta$ , Rev1<br>Pol, Pol $\theta$ |
| Catalytic mutant Rev1 | 306                                        | 48                                                    | 15.7    | Pol $\iota$ /Pol $\zeta$ , Pol $\theta$              |

**Supplemental Table S4**

Effects of catalytically active (WT) or catalytically inactive D2540A E2541A mutant (1708-2590) Pol $\theta$  on TLS opposite  $\epsilon$ dA carried on the leading strand template in human fibroblasts

| siRNA        | Vector expressing                 | No. Kan <sup>+</sup> colonies | No. blue colonies among Kan <sup>+</sup> | TLS (%) |
|--------------|-----------------------------------|-------------------------------|------------------------------------------|---------|
| NC           | -                                 | 404                           | 102                                      | 25.2    |
| Pol $\theta$ | -                                 | 336                           | 52                                       | 15.5    |
| Pol $\theta$ | WT Pol $\theta$                   | 324                           | 48                                       | 14.8    |
| Pol $\theta$ | siR <sup>a</sup> -WT Pol $\theta$ | 315                           | 74                                       | 23.5    |
| Pol $\theta$ | siR catalytic mutant Pol $\theta$ | 287                           | 42                                       | 14.6    |

<sup>a</sup>siR, indicates siRNA resistant form of WT or mutant Pol $\theta$

### Supplemental Table S5

Effects of catalytically active (WT) or catalytically inactive D2540A E2541A mutant (1708-2590) Pol $\theta$  on TLS opposite  $\epsilon$ dA carried on the leading strand template in Pol $\theta^{-/-}$  MEFs

| Vector expressing             | Number of <i>Kan</i> <sup>+</sup> colonies | Number of blue colonies among <i>Kan</i> <sup>+</sup> | TLS (%) | TLS pathways that remain active                   |
|-------------------------------|--------------------------------------------|-------------------------------------------------------|---------|---------------------------------------------------|
| —                             | 381                                        | 42                                                    | 11.0    | Pol $\iota$ /Pol $\zeta$ , Rev1 Pol               |
| WT Pol $\theta$               | 332                                        | 73                                                    | 22.0    | Pol $\iota$ /Pol $\zeta$ , Rev1 Pol, Pol $\theta$ |
| Catalytic mutant Pol $\theta$ | 295                                        | 31                                                    | 10.5    | Pol $\iota$ Pol $\zeta$ , Rev1 Pol                |



**Supplemental Table S6**

Effect of wild type Pol $\theta$ , catalytically active (WT) Rev1, or catalytically inactive D570A E571A mutant Rev1 on mutation frequencies and nucleotides inserted opposite  $\epsilon$ dA carried on the leading strand DNA template in wild type, Rev1<sup>-/-</sup>, or Pol $\theta$ <sup>-/-</sup> MEFs

| MEFs                                                   | Vector expressing, siRNAs | No. of <i>Kan</i> <sup>+</sup> blue colonies sequenced | Nucleotide inserted |   |   |    | Mutation frequency (%) | Error-prone TLS pathway that remains active |
|--------------------------------------------------------|---------------------------|--------------------------------------------------------|---------------------|---|---|----|------------------------|---------------------------------------------|
|                                                        |                           |                                                        | A                   | G | C | T  |                        |                                             |
| WT                                                     | None                      | 96 (12) <sup>a</sup>                                   | 3                   | 0 | 9 | 84 | 12.5                   | Rev1, Pol $\theta$                          |
| Pol $\theta$ <sup>-/-</sup>                            | Vector control            | 96 (9)                                                 | 1                   | 0 | 8 | 87 | 9.4                    | Rev1                                        |
| Rev1 <sup>-/-</sup>                                    | Vector control            | 96 (8)                                                 | 4                   | 0 | 4 | 88 | 8.3                    | Pol $\theta$                                |
| Rev1 <sup>-/-</sup> (mPol $\theta$ siRNA) <sup>b</sup> | Flag-Mutant - Rev1        | 90 (0)                                                 | 0                   | 0 | 0 | 90 | 0                      | none                                        |

<sup>a</sup>Number of colonies where TLS occurred by insertion of a nucleotide other than T are shown in parentheses.

<sup>b</sup>Rev1<sup>-/-</sup> MEFs were treated with mPol $\theta$  siRNA. In these MEFs carrying Flag-mutant Rev1, only the Pol $\iota$ /Pol $\zeta$  dependent error-free pathway remains active.

## Supplemental Figure Legends

### Supplemental Figure S1

Assay for TLS opposite  $\epsilon$ dA. (A), Chemical structure of A and  $\epsilon$ dA. (B), The target 16mer sequence containing  $\epsilon$ dA at  $\overset{*}{A}$  is shown on top, and the lacZ' sequence in the leading strand in the pBS vector containing the adduct at  $\underset{*}{A}$  is shown below. The  $\epsilon$ dA-containing DNA strand is in-frame and it carries the *Kan<sup>+</sup>* gene. TLS through the adduct generates *Kan<sup>+</sup>* blue colonies.

### Supplemental Figure S2

Efficiency of siRNA knockdown of TLS Pols in HFs and MEFs. (A) Western blot analyses of siRNA knockdown of TLS Pols in GM637 HFs. NC: negative control siRNA. (B) Western blot analyses of siRNA knockdown of TLS Pols in Rev1<sup>-/-</sup> MEFs. (C) Western blot analyses of the efficiency of siRNA knockdown of TLS Pols in Polθ<sup>-/-</sup> MEFs. In (A), (B), and (C), β-tubulin was used as the loading control. (D) RT-PCR analyses of the efficiency of siRNA knockdown of Rev3 in HFs (left) and MEFs (right). In both panels, the first lanes contains molecular weight markers. GAPDH is used as a loading control for RT-PCR. RT-PCR analyses were done as described (Yoon et al. 2009).

### Supplemental Figure S3

Nucleotide incorporation opposite A or  $\epsilon$ dA by Rev1. 0.5 nM Rev1 was incubated with 10 nM DNA substrate and 25 uM of either dGTP, dATP, dTTP, dCTP, or all 4 dNTPs for 5 min at 37C. Reactions containing a single dNTP or all 4 dNTPs (N) are indicated. The template in lanes 1-5 contains an undamaged template A at the primer terminus. Lanes 6-20 harbor  $\epsilon$ dA at the primer terminus followed by either T (lanes 6-10), A (lanes 11-15) or G (lanes 16-20) residue, indicated by D in the template sequence. X in the template sequence indicates the site of undamaged A or  $\epsilon$ dA.

#### Supplemental Figure S4

TLS pathways for replicating through  $\epsilon$ dA in human cells. Replication through  $\epsilon$ dA occurs *via* 3 different pathways in which the Pol $\iota$ /Pol $\zeta$  pathway conducts error-free TLS and Rev1 functions as a non-catalytic component of Pol $\iota$  in this pathway. Rev1 polymerase activity contributes to error-prone TLS *via* a pathway independent of Pol $\iota$ /Pol $\zeta$  and Pol $\theta$  functions in another independent error-prone TLS pathway.

Yoon J-H, Prakash, L, and Prakash, S. 2009. Highly error-free role of DNA polymerase  $\eta$  in the replicative bypass of UV induced pyrimidine dimers in mouse and human cells. *Proc Natl Acad Sci U S A* **106**: 18219-18224.

A

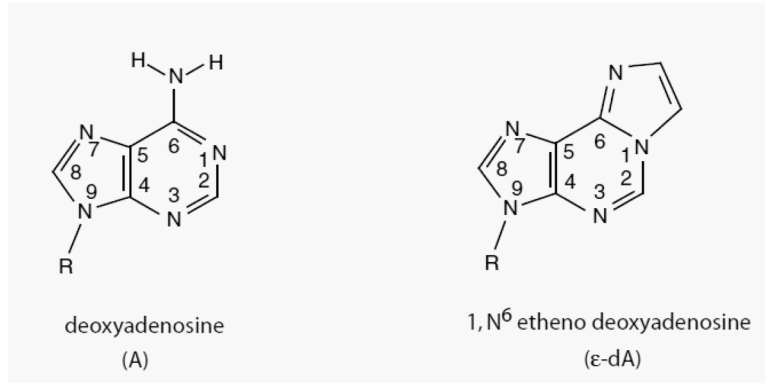

B

5'-GGAAGC AAT <sup>\*</sup> A GTACGG-3'

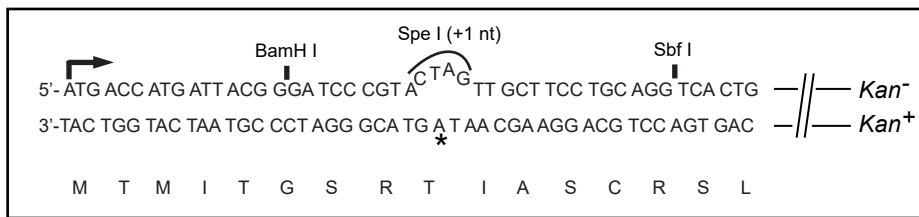

Leading strand (pBS vector)

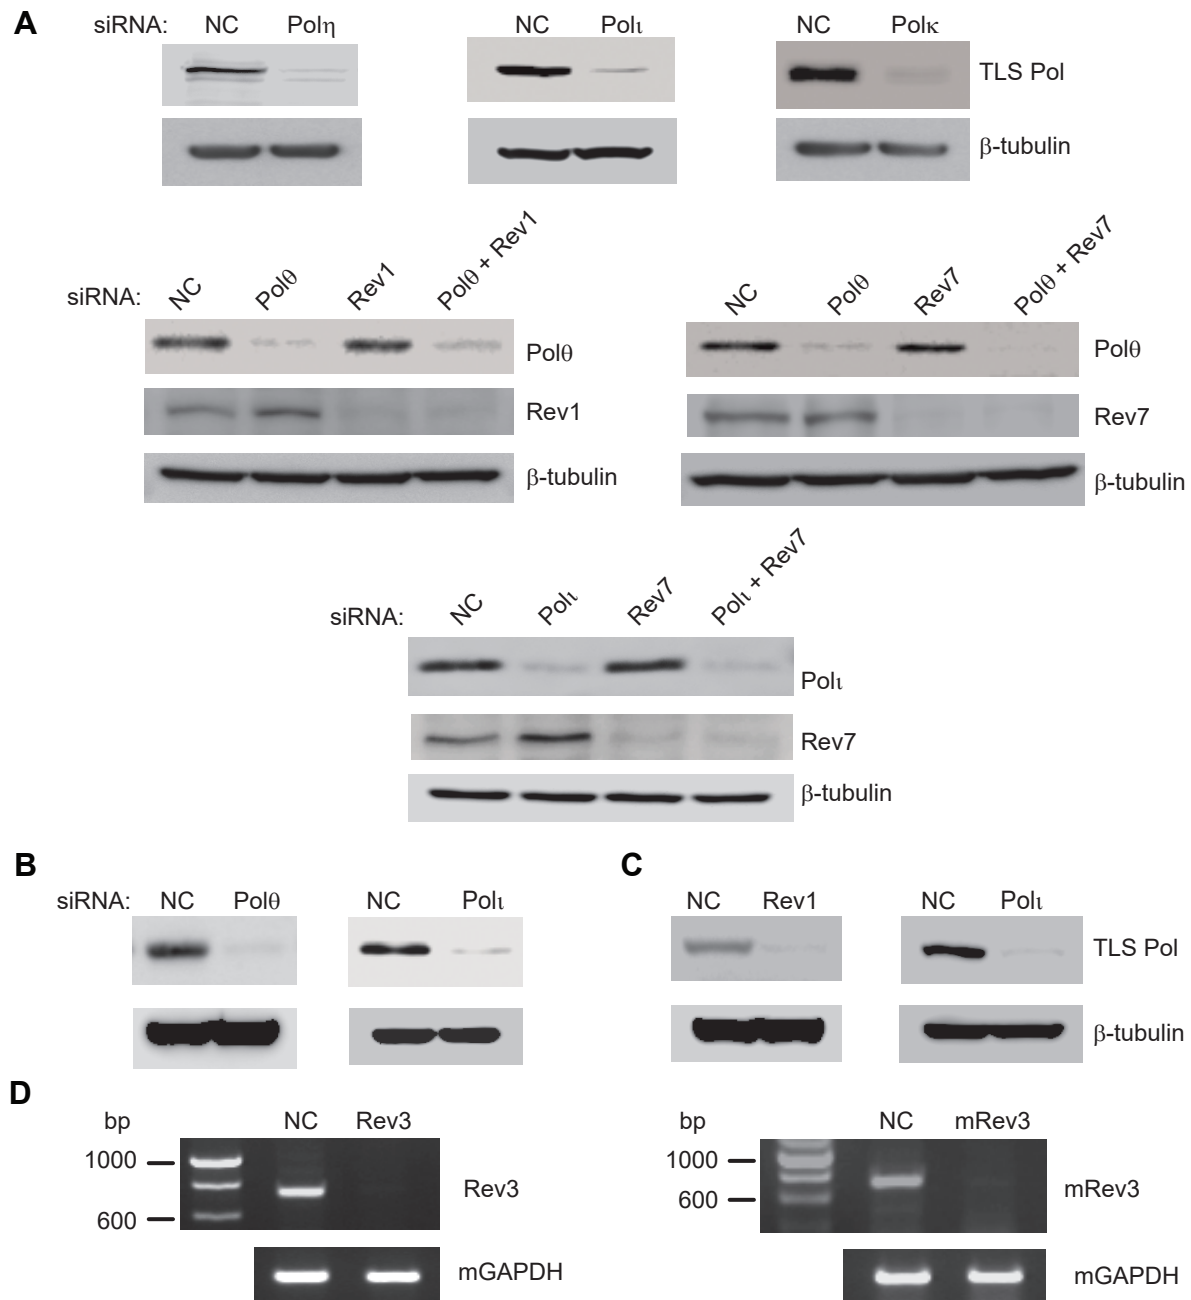

Supplemental\_Fig\_S3.pdf

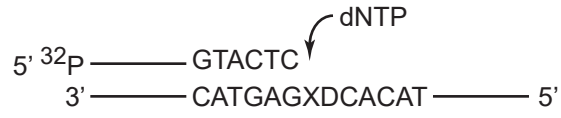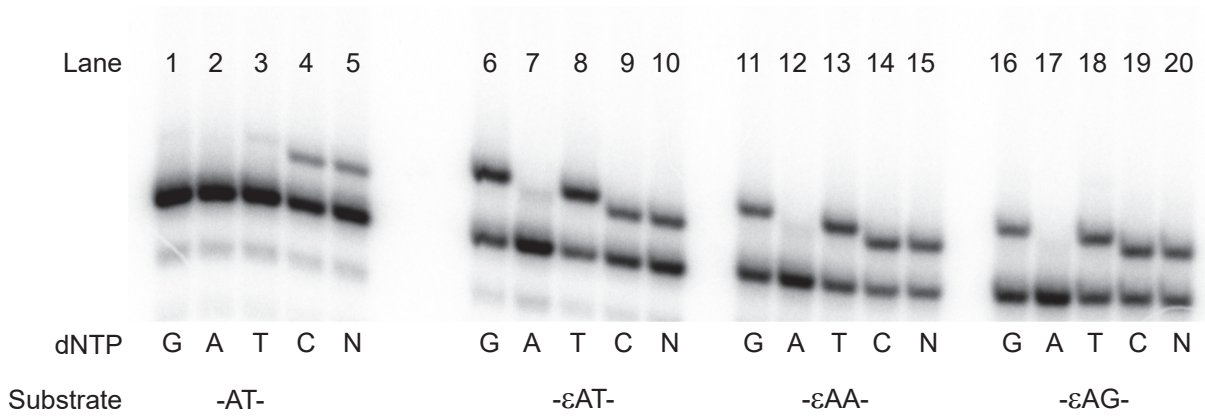

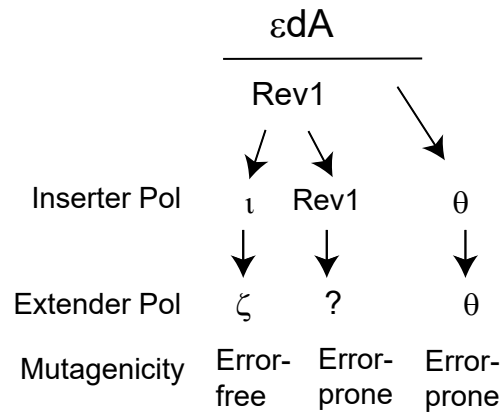

Supplement: supp_gad.320531.118_Supplemental_Material_.pdf [file supp_gad.320531.118_Supplemental_Material_.pdf]
